# Supplementary material for: An End-To-End Pipeline for Fully Automatic Morphological Quantification of Mouse Brain Structures From MRI Imagery
Source: Frontiers journal article supplement (doi:10.3389/fbinf.2022.865443), 2022-06-08
Supplement: Data_Sheet_1.pdf [file Data_Sheet_1.pdf]

1

---

2 ***Supplementary Material for “An end-to-end pipeline***  
3 ***for fully automatic morphological quantification of***  
4 ***mouse brain structures from MRI imagery”***

## 1 MODEL PARAMETERS AND MEMORY REQUIREMENTS

5 The network architecture of DeepBrainIPP is deep, and we trained the model on the full image. therefore, it  
6 required a large amount of GPU memory to store outcomes of intermediate layers. The memory requirement  
7 below is only approximate due to additional memory needs for the Adam optimizer and implementation  
8 overhead. The ex vivo models have 8,268,743 trainable parameters, with an estimated memory requirement  
9 of 32 MB. The required memory for storing intermediate layer outputs for input dimensions of 256 x  
10 224 x 288 was approximately 32,513MB. The additional memory required for the Adam optimizer and  
11 implementation was approximately 5596MB. Therefore, the total required memory to train ex vivo models  
12 was approximately 38 GB with a batch size of 1. Similarly, the total required memory for in vivo models  
13 with an input dimension of 448 x 448 x48, and trainable parameters of 8,273,867 is approximately 23 GB  
14 for a batch size of 1. Given limitations of GPU memory available for this study, training was restricted to a  
15 batch size of one.

## 2 SUPPLEMENTARY TABLES AND FIGURES

**Table S1.** Brain structures segmented from ex vivo and in vivo MRI image volumes

| Segmented structures (ex vivo) | Sub-Cerebellar structures (ex vivo) | Segmented structures (in vivo) |
|--------------------------------|-------------------------------------|--------------------------------|
| Hippocampus                    | Vermis-I-II                         | Cerebellum                     |
| External-Capsule               | Vermis-IV-V                         | External-Capsule               |
| Caudate-Putamen                | Vermis-VI                           | Hippocampus                    |
| Globus-Pallidus                | Vermis-VII                          | Brain-stem                     |
| Thalamus                       | Vermis-VIII                         | Ventricles                     |
| Superior-Colliculi             | Vermis-IX                           | Olfactory-bulb                 |
| Ventricles                     | Vermis-X                            | Cortex                         |
| Hypothalamus                   | Simple-Lobule-left                  | Hypothalamus                   |
| Inferior-Colliculi             | Simple-Lobule-right                 | Thalamus                       |
| Central-Gray                   | Crus-I-left                         | Caudate-Putamen                |
| Anterior-Commissure            | Cerebellum                          | Rest-of-Brain                  |
| Cerebellum                     | Crus-I-right                        |                                |
| Internal-Capsule               | Crus-II-left                        |                                |
| Neocortex                      | Crus-II-right                       |                                |
| Amygdala                       | Paramedian-Lobule-left              |                                |
| Olfactory-bulb                 | Paramedian-Lobule-right             |                                |
| Brain-Stem                     | Copula-left                         |                                |
| Rest-of-Midbrain               | Copula-right                        |                                |
| Basal-Forebrain-Septum         | Paraflocculus-left                  |                                |
| Fimbria                        | Paraflocculus-right                 |                                |
|                                | Flocculus-left                      |                                |
|                                | Flocculus-right                     |                                |
|                                | Arbor-Vitae                         |                                |

**Table S2.** Performance of Skull Stripping of DeepBrainIPP and State-of-the-art methods on various dataset

| Network      | TEST Dataset (mouse MRI images) | Dice        | Jaccard     | PPV         | Sensitivity | Hausdorff   |
|--------------|---------------------------------|-------------|-------------|-------------|-------------|-------------|
| DeepBrainIPP | T2w TSE                         | <b>0.96</b> | <b>0.92</b> | <b>0.96</b> | <b>0.95</b> | <b>0.77</b> |
| MU-Net       | T2w                             | 0.97*       | -           | 0.96        | -           | -           |
| U-net        | CAMRI dataset (T2w RARE)        | 0.85        | 0.74        | 0.74        | 0.98        | 5.23        |
| RATS         | CAMRI dataset (T2w RARE)        | 0.82        | 0.70        | 0.76        | 0.91        | 5.07        |
| PCNN         | CAMRI dataset (T2w RARE)        | 0.79        | 0.65        | 0.76        | 0.83        | 7.07        |
| SHERM        | CAMRI dataset (T2w RARE)        | 0.80        | 0.67        | 0.72        | 0.90        | 7.03        |

\*We were not able to reproduce this Dice score for our dataset using published network weights.

**Table S3.** Item/Question PYTHEIA Analysis.

| Questions/Items | Scale Mean<br>if Item<br>Deleted | Scale Variance<br>if Item<br>Deleted | Corrected<br>Item-Total<br>Correlation | Cronbach's<br>Alpha if<br>item Deleted |
|-----------------|----------------------------------|--------------------------------------|----------------------------------------|----------------------------------------|
| Question1       | 85.00                            | 92.250                               | 0.878.                                 | 0.921                                  |
| Question2       | 85.67                            | 97.750                               | 0.582.                                 | 0.928                                  |
| Question3       | 85.44                            | 95.778                               | 0.565.                                 | 0.928                                  |
| Question4       | 85.22                            | 90.444                               | 0.840.                                 | 0.921                                  |
| Question5       | 85.33                            | 101.000                              | 0.267.                                 | 0.933                                  |
| Question6       | 85.56                            | 89.528                               | 0.604.                                 | 0.929                                  |
| Question7       | 85.11                            | 92.361                               | 0.869.                                 | 0.922                                  |
| Question8       | 85.11                            | 86.361                               | 0.936.                                 | 0.918                                  |
| Question9       | 85.44                            | 83.778                               | 0.845.                                 | 0.921                                  |
| Question10      | 85.22                            | 86.944                               | 0.916.                                 | 0.918                                  |
| Question11      | 84.89                            | 106.611                              | -0.143                                 | 0.941                                  |
| Question12      | 84.89                            | 101.361                              | 0.222.                                 | 0.934                                  |
| Question13      | 85.33                            | 92.250                               | 0.634.                                 | 0.926                                  |
| Question14      | 85.56                            | 94.278                               | 0.502.                                 | 0.930                                  |
| Question15      | 85.00                            | 91.750                               | 0.916.                                 | 0.921                                  |
| Question16      | 85.22                            | 87.694                               | 0.872.                                 | 0.920                                  |
| Question17      | 84.89                            | 98.361                               | .647.                                  | .927                                   |

**Table S4.** The average score received by each item/question from all participants.

| Questions/Items | Mean | Std. Deviation | N (Number of Participants) |
|-----------------|------|----------------|----------------------------|
| Question1       | 5.56 | 0.726          | 9                          |
| Question2       | 4.89 | 0.601          | 9                          |
| Question3       | 5.11 | 0.782          | 9                          |
| Question4       | 5.33 | 0.866          | 9                          |
| Question5       | 5.22 | 0.667          | 9                          |
| Question6       | 5.00 | 1.225          | 9                          |
| Question7       | 5.44 | 0.726          | 9                          |
| Question8       | 5.44 | 1.014          | 9                          |
| Question9       | 5.11 | 1.269          | 9                          |
| Question10      | 5.33 | 1.000          | 9                          |
| Question11      | 5.67 | 0.707          | 9                          |
| Question12      | 5.67 | 0.707          | 9                          |
| Question13      | 5.22 | 0.972          | 9                          |
| Question14      | 5.00 | 1.000          | 9                          |
| Question15      | 5.56 | 0.726          | 9                          |
| Question16      | 5.33 | 1.000          | 9                          |
| Question17      | 5.67 | 0.500          | 9                          |

**Table S5.** The average score provided by participants.

| Participants | Mean | Std. Deviation | N (number of statements) |
|--------------|------|----------------|--------------------------|
| Participant1 | 5.35 | 0.493          | 17                       |
| Participant2 | 5.59 | 0.507          | 17                       |
| Participant3 | 5.71 | 0.588          | 17                       |
| Participant4 | 5.47 | 0.624          | 17                       |
| Participant5 | 5.82 | 0.529          | 17                       |
| Participant6 | 5.41 | 1.004          | 17                       |
| Participant7 | 3.94 | 1.088          | 17                       |
| Participant8 | 5.82 | 0.393          | 17                       |
| Participant9 | 4.82 | 0.393          | 17                       |

### Interface for Skull Stripping

Frequent
Sometimes
Rare

outputfile

Enter output file directory

Input folder

Image Spacing

0.06,0.06,0.06

Folder Name or Pattern

Model Type

exvivo-2

Need Re-slicing?

NO

Manual file organization?

0

Submit Job

### Interface for Image Registration

Frequent
Sometimes
Rare

outputfile

Enter output file directory

out\_file\_prefix\_name

SIMtoEM

fixed\_file\_path

Enter path for fixed file

move\_file\_path

Enter path for movable file

reg\_param\_cmd

--verbose 1 --dimensionality 3 --float 0

operation type

antsregistration ▼

Run in batch

0

Cerebellum Registration?

0

Submit Job

**Figure S1:** Web interface screenshot: Left: Skull stripping. Right: Image registration. DeepBrainIPP automatically organizes files and allows users to batch process.

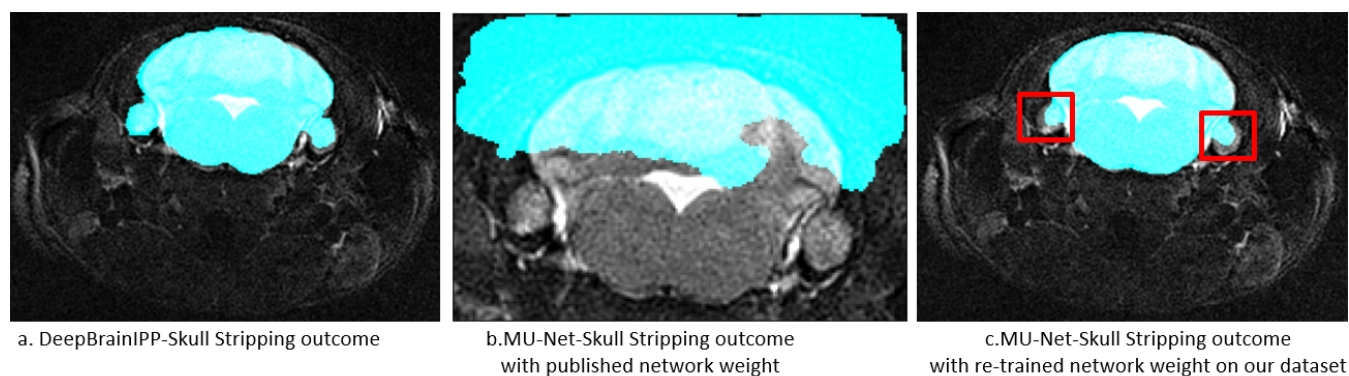

Figure S2: Skull stripping comparison: DeepBrainIPP vs MU-Net. (a) DeepBrainIPP skull-stripping captures the large-scale outline and parafoveolus lobules well. (b) MU-Net (published weights) underestimates and overestimated brain regions. (c) MU-Net(SKULLNET), trained on our dataset and with our data augmentation, significantly improves skull stripping, although parafoveolus was not segmented accurately (red box). Prediction masks: cyan overlayed with original data.

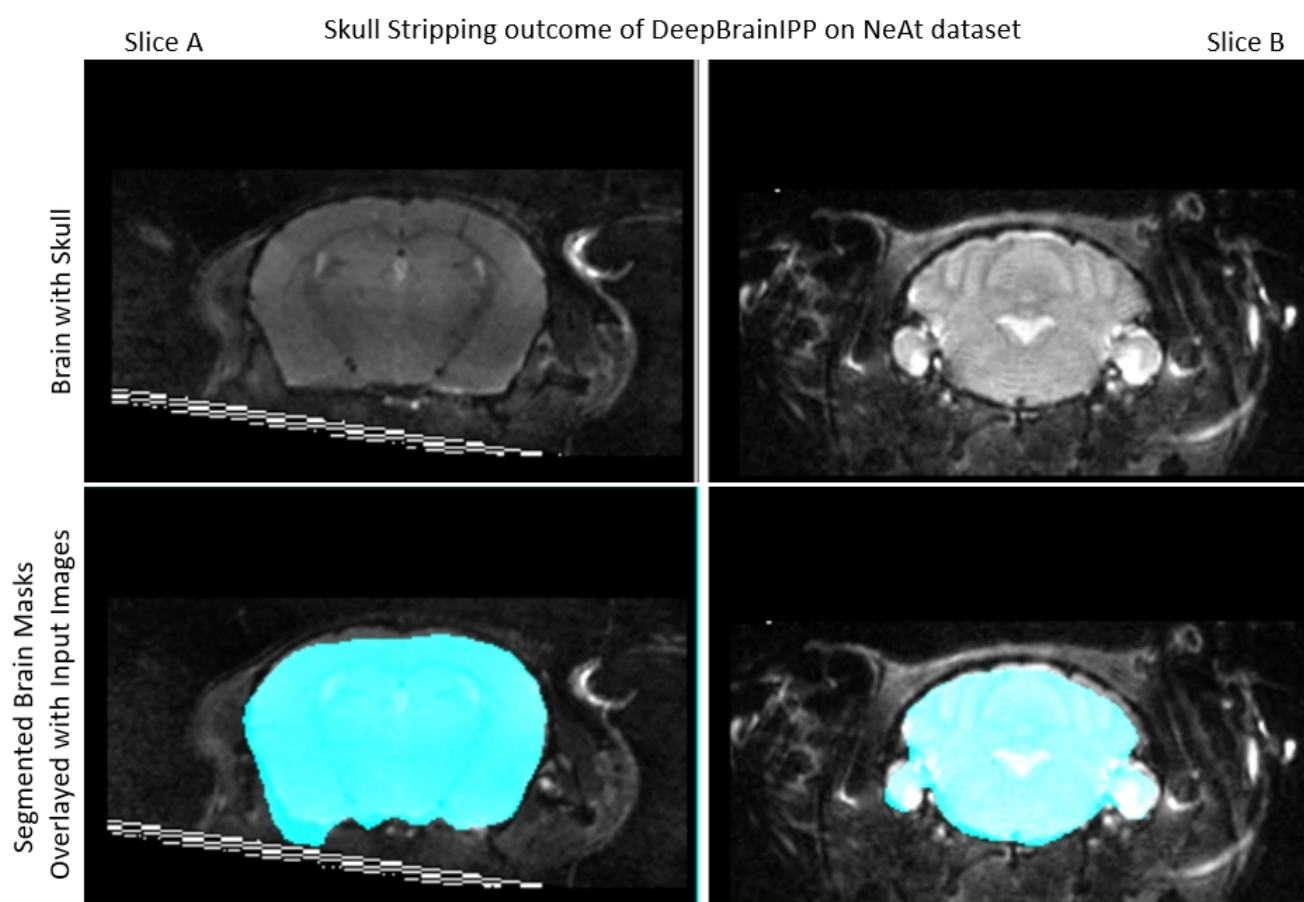

Figure S3: Example outcome of DeepBrainIPP trained on our in-house dataset when applied to skull-stripping segmentation of the NeAt dataset. Prediction masks (cyan color) overlayed with original data. Slice A and Slice B are random z-slices captured from a sample volume.

### Questionnaire for user study

Participants Name:

Area of Expertise:

The following statements are to evaluate effectiveness of DeepBrainIPP as a whole. Please rate your satisfaction with, and confidence in, the following statements on a 6-point scale.

#### Likert scale for question 1-10

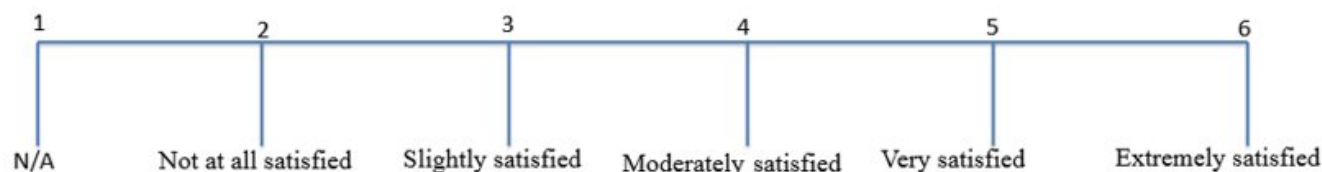

#### Likert scale for question 11-18

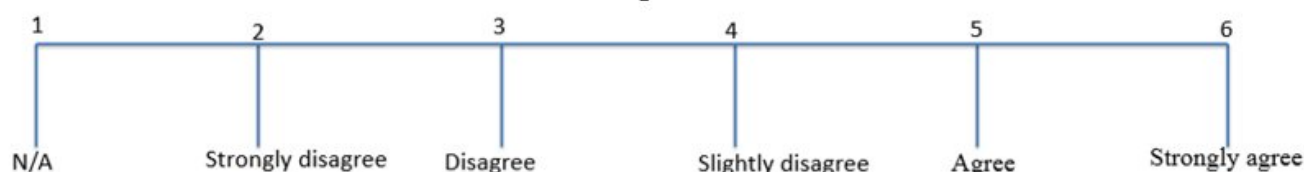

|                                                                                                                                |  |
|--------------------------------------------------------------------------------------------------------------------------------|--|
| 1. Rate your satisfaction with DeepBrainIPP in relation to its accessibility through a web browser                             |  |
| 2. Rate your satisfaction with DeepBrainIPP in relation to the ease of learning all individual functions.                      |  |
| 3. Rate your satisfaction with DeepBrainIPP in relation to the ease of use (complexity, required effort).                      |  |
| 4. Rate your satisfaction with DeepBrainIPP in relation to sufficiency of existing functions                                   |  |
| 5. Rate your satisfaction with DeepBrainIPP in relation to ease of job submissions, management, and monitoring                 |  |
| 6. Rate your satisfaction with DeepBrainIPP in relation to ease of entering/modifying parameters                               |  |
| 7. Rate your satisfaction with DeepBrainIPP to segment mouse brain data                                                        |  |
| 8. Rate your satisfaction with DeepBrainIPP to register an extracted brain to an atlas and segment larger regions              |  |
| 9. Rate your satisfaction with DeepBrainIPP to segment smaller brain regions                                                   |  |
| 10. Rate your satisfaction with DeepBrainIPP in relation to its effectiveness as a tool for mouse brain structure segmentation |  |

Figure S4: Questionnaire for subjective evaluation and to measure user satisfaction.

The following statements are to evaluate the effectiveness of utility features of DeepBrainIPP.

|                                                                                                      |  |
|------------------------------------------------------------------------------------------------------|--|
| 11. I do not need to install any software/packages/dependencies to use DeepBrainIPP                  |  |
| 12. I do not need to know details of the image analysis algorithms to segment mouse brain structures |  |
| 13. I don't need to perform any special dataset organization or preprocessing                        |  |
| 14. DeepBrainIPP produces results sufficient for morphogenetic characterization                      |  |
| 15. I feel more autonomous when I use DeepBrainIPP for mouse brain structures segmentation           |  |
| 16. DeepBrainIPP eliminates the burden of manual segmentation                                        |  |
| 17. I will recommend DeepBrainIPP to others                                                          |  |

Comments/Suggestions:

Figure S5: Questionnaire for subjective evaluation and to measure user satisfaction.
